# Supplementary material
Source: PubMed Central journal article supplement (PMC2666359)
Supplement: jn.108.102020_1.pdf [file jn.108.102020_1.pdf]

**SUPPLEMENTAL TABLE 1**Concentrations of amino acids in maternal plasma after a single iv bolus injection of L-arginine-HCl to late pregnant ewes<sup>1</sup>

| Amino acid            | Time after bolus injection (min) |                    |                     |                   |                     |                    |                   |                   | SEM | <i>P</i> value |
|-----------------------|----------------------------------|--------------------|---------------------|-------------------|---------------------|--------------------|-------------------|-------------------|-----|----------------|
|                       | 0                                | 5                  | 15                  | 30                | 60                  | 120                | 180               | 240               |     |                |
|                       | $\mu\text{mol/L}$                |                    |                     |                   |                     |                    |                   |                   |     |                |
| Aspartate             | 12 <sup>a</sup>                  | 10 <sup>ab</sup>   | 8.4 <sup>bc</sup>   | 9.9 <sup>ab</sup> | 7.6 <sup>bc</sup>   | 8.1 <sup>bc</sup>  | 6.0 <sup>c</sup>  | 7.3 <sup>bc</sup> | 1.8 | 0.006          |
| Glutamate             | 73 <sup>ab</sup>                 | 69 <sup>ab</sup>   | 70 <sup>ab</sup>    | 78 <sup>a</sup>   | 69 <sup>ab</sup>    | 78 <sup>a</sup>    | 64 <sup>b</sup>   | 62 <sup>b</sup>   | 11  | 0.047          |
| Asparagine            | 22 <sup>a</sup>                  | 23 <sup>a</sup>    | 22 <sup>a</sup>     | 24 <sup>a</sup>   | 22 <sup>a</sup>     | 22 <sup>a</sup>    | 17 <sup>b</sup>   | 18 <sup>b</sup>   | 3   | 0.005          |
| Serine                | 82                               | 78                 | 71                  | 80                | 65                  | 69                 | 59                | 66                | 14  | 0.081          |
| Glutamine             | 179 <sup>b</sup>                 | 205 <sup>ab</sup>  | 206 <sup>ab</sup>   | 224 <sup>a</sup>  | 203 <sup>ab</sup>   | 209 <sup>ab</sup>  | 179 <sup>b</sup>  | 184 <sup>b</sup>  | 38  | 0.023          |
| Histidine             | 31 <sup>b</sup>                  | 38 <sup>a</sup>    | 35 <sup>ab</sup>    | 35 <sup>ab</sup>  | 33 <sup>ab</sup>    | 33 <sup>ab</sup>   | 29 <sup>b</sup>   | 29 <sup>b</sup>   | 4   | 0.040          |
| Glycine               | 346                              | 406                | 381                 | 414               | 385                 | 415                | 381               | 364               | 55  | 0.398          |
| Threonine             | 67 <sup>ab</sup>                 | 70 <sup>a</sup>    | 68 <sup>a</sup>     | 75 <sup>a</sup>   | 66 <sup>ab</sup>    | 69 <sup>a</sup>    | 57 <sup>c</sup>   | 58 <sup>bc</sup>  | 10  | 0.008          |
| $\beta$ -Alanine      | 22                               | 22                 | 22                  | 24                | 22                  | 24                 | 21                | 22                | 6   | 0.432          |
| Taurine               | 62 <sup>bc</sup>                 | 79 <sup>a</sup>    | 74 <sup>ab</sup>    | 76 <sup>ab</sup>  | 64 <sup>bc</sup>    | 67 <sup>ab</sup>   | 52 <sup>c</sup>   | 56 <sup>bc</sup>  | 9   | 0.002          |
| Alanine               | 112 <sup>b</sup>                 | 117 <sup>ab</sup>  | 113 <sup>b</sup>    | 126 <sup>a</sup>  | 112 <sup>b</sup>    | 118 <sup>ab</sup>  | 99 <sup>c</sup>   | 98 <sup>c</sup>   | 15  | 0.001          |
| Tyrosine              | 43                               | 47                 | 45                  | 50                | 45                  | 47                 | 40                | 42                | 6   | 0.087          |
| Tryptophan            | 31                               | 31                 | 29                  | 32                | 29                  | 31                 | 27                | 29                | 5   | 0.627          |
| Methionine            | 18 <sup>c</sup>                  | 21 <sup>ab</sup>   | 20 <sup>abc</sup>   | 23 <sup>a</sup>   | 21 <sup>ab</sup>    | 21 <sup>ab</sup>   | 18 <sup>c</sup>   | 19 <sup>bc</sup>  | 4   | 0.020          |
| Valine                | 92                               | 83                 | 63                  | 89                | 81                  | 84                 | 70                | 72                | 13  | 0.251          |
| Phenylalanine         | 42                               | 52                 | 54                  | 59                | 51                  | 54                 | 47                | 51                | 18  | 0.188          |
| Isoleucine            | 48                               | 49                 | 48                  | 54                | 47                  | 50                 | 42                | 44                | 5   | 0.117          |
| Leucine               | 89 <sup>ab</sup>                 | 92 <sup>ab</sup>   | 89 <sup>ab</sup>    | 97 <sup>a</sup>   | 87 <sup>abc</sup>   | 89 <sup>ab</sup>   | 75 <sup>c</sup>   | 81 <sup>bc</sup>  | 11  | 0.050          |
| Lysine                | 69 <sup>cd</sup>                 | 97 <sup>a</sup>    | 91 <sup>a</sup>     | 95 <sup>a</sup>   | 81 <sup>b</sup>     | 77 <sup>bc</sup>   | 63 <sup>d</sup>   | 69 <sup>cd</sup>  | 10  | 0.001          |
| Cysteine <sup>2</sup> | 165                              | 167                | 165                 | 166               | 165                 | 165                | 166               | 166               | 9   | 0.995          |
| Proline               | 96 <sup>c</sup>                  | 109 <sup>d</sup>   | 118 <sup>c</sup>    | 130 <sup>b</sup>  | 147 <sup>a</sup>    | 126 <sup>bc</sup>  | 109 <sup>d</sup>  | 99 <sup>e</sup>   | 4   | 0.001          |
| Total amino acids     | 1701 <sup>bc</sup>               | 1864 <sup>ab</sup> | 1792 <sup>abc</sup> | 1960 <sup>a</sup> | 1804 <sup>abc</sup> | 1856 <sup>ab</sup> | 1620 <sup>c</sup> | 1634 <sup>c</sup> | 169 | 0.020          |

<sup>1</sup> Values are means with pooled SEM, n=6. Means in a row with superscripts without a common letter differ, *P* < 0.05.<sup>2</sup> Cysteine + ½ cystine.

**SUPPLEMENTAL TABLE 2**Concentrations of amino acids in maternal plasma after a single iv bolus injection of L-citrulline to late pregnant ewes<sup>1</sup>

| Amino acid            | Time after bolus injection (min) |                    |                   |                   |                   |                   |                  |                   | SEM | P value |
|-----------------------|----------------------------------|--------------------|-------------------|-------------------|-------------------|-------------------|------------------|-------------------|-----|---------|
|                       | 0                                | 5                  | 15                | 30                | 60                | 120               | 180              | 240               |     |         |
|                       | µmol/L                           |                    |                   |                   |                   |                   |                  |                   |     |         |
| Aspartate             | 9.6 <sup>a</sup>                 | 8.6 <sup>abc</sup> | 8.8 <sup>ab</sup> | 7.6 <sup>bc</sup> | 7.6 <sup>bc</sup> | 7.4 <sup>bc</sup> | 7.0 <sup>c</sup> | 7.3 <sup>bc</sup> | 1   | 0.040   |
| Glutamate             | 69                               | 72                 | 76                | 69                | 70                | 68                | 71               | 69                | 8   | 0.750   |
| Asparagine            | 24                               | 25                 | 31                | 24                | 24                | 22                | 23               | 23                | 3   | 0.258   |
| Serine                | 70                               | 66                 | 68                | 64                | 63                | 64                | 64               | 64                | 10  | 0.543   |
| Glutamine             | 203                              | 234                | 244               | 228               | 222               | 220               | 223              | 224               | 39  | 0.432   |
| Histidine             | 35                               | 41                 | 42                | 38                | 36                | 35                | 37               | 36                | 5   | 0.250   |
| Glycine               | 326                              | 380                | 399               | 375               | 358               | 369               | 374              | 385               | 52  | 0.309   |
| Threonine             | 69                               | 71                 | 75                | 70                | 69                | 67                | 72               | 73                | 10  | 0.940   |
| β-Alanine             | 21                               | 22                 | 22                | 21                | 21                | 21                | 21               | 21                | 5   | 0.384   |
| Taurine               | 69                               | 79                 | 83                | 78                | 80                | 71                | 65               | 67                | 8   | 0.286   |
| Alanine               | 106                              | 113                | 117               | 107               | 106               | 99                | 102              | 99                | 15  | 0.226   |
| Tyrosine              | 44                               | 53                 | 55                | 52                | 53                | 50                | 53               | 53                | 6   | 0.232   |
| Tryptophan            | 31                               | 35                 | 36                | 34                | 33                | 33                | 35               | 34                | 5   | 0.176   |
| Methionine            | 19                               | 20                 | 20                | 19                | 19                | 18                | 19               | 19                | 2   | 0.885   |
| Valine                | 100                              | 117                | 120               | 110               | 112               | 105               | 112              | 112               | 13  | 0.431   |
| Phenylalanine         | 45                               | 42                 | 43                | 40                | 40                | 38                | 40               | 40                | 7   | 0.937   |
| Isoleucine            | 53                               | 60                 | 64                | 54                | 43                | 53                | 54               | 54                | 6   | 0.344   |
| Leucine               | 93                               | 102                | 104               | 95                | 94                | 88                | 91               | 93                | 11  | 0.554   |
| Lysine                | 78                               | 88                 | 93                | 88                | 88                | 87                | 90               | 90                | 10  | 0.633   |
| Cysteine <sup>2</sup> | 168                              | 165                | 164               | 164               | 172               | 167               | 166              | 162               | 9   | 0.193   |
| Proline               | 93 <sup>d</sup>                  | 93 <sup>d</sup>    | 96 <sup>cd</sup>  | 110 <sup>b</sup>  | 121 <sup>a</sup>  | 100 <sup>c</sup>  | 97 <sup>cd</sup> | 93 <sup>d</sup>   | 4   | 0.001   |
| Total amino acids     | 1725                             | 1886               | 1959              | 1848              | 1833              | 1782              | 1806             | 1818              | 149 | 0.590   |

<sup>1</sup> Values are means with pooled SEM, n=6. Means in a row with superscripts without a common letter differ,  $P < 0.05$ .<sup>2</sup> Cysteine + ½ cystine.

**SUPPLEMENTAL TABLE 3**

Concentrations of amino acids in fetal plasma after a single iv bolus injection of L-arginine-HCl to late pregnant ewes

| Amino acid            | Time after bolus injection (min) |                  |                  |                   |                  |                  |                   |                  | SEM | P value |
|-----------------------|----------------------------------|------------------|------------------|-------------------|------------------|------------------|-------------------|------------------|-----|---------|
|                       | 0                                | 5                | 15               | 30                | 60               | 120              | 180               | 240              |     |         |
|                       | $\mu\text{mol/L}$                |                  |                  |                   |                  |                  |                   |                  |     |         |
| Aspartate             | 4.7                              | 5.0              | 5.8              | 5.8               | 4.2              | 4.6              | 3.6               | 4.3              | 0.7 | 0.169   |
| Glutamate             | 34                               | 29               | 32               | 32                | 29               | 28               | 28                | 31               | 3   | 0.418   |
| Asparagine            | 24                               | 22               | 19               | 20                | 21               | 21               | 22                | 23               | 2   | 0.267   |
| Serine                | 292                              | 336              | 260              | 270               | 277              | 292              | 303               | 309              | 58  | 0.536   |
| Glutamine             | 210                              | 191              | 188              | 183               | 188              | 180              | 217               | 189              | 17  | 0.683   |
| Histidine             | 30                               | 26               | 25               | 26                | 23               | 26               | 29                | 32               | 3   | 0.082   |
| Glycine               | 278                              | 267              | 300              | 288               | 260              | 270              | 289               | 317              | 29  | 0.082   |
| Threonine             | 145                              | 155              | 124              | 154               | 128              | 134              | 133               | 139              | 25  | 0.703   |
| B-Alanine             | 151                              | 152              | 138              | 142               | 143              | 148              | 147               | 155              | 46  | 0.523   |
| Taurine               | 94                               | 103              | 79               | 86                | 90               | 89               | 89                | 103              | 17  | 0.508   |
| Alanine               | 154                              | 142              | 132              | 137               | 140              | 144              | 146               | 153              | 19  | 0.202   |
| Tyrosine              | 61                               | 59               | 55               | 57                | 55               | 55               | 56                | 59               | 12  | 0.689   |
| Tryptophan            | 76                               | 68               | 62               | 62                | 71               | 70               | 71                | 73               | 28  | 0.786   |
| Methionine            | 24                               | 23               | 21               | 21                | 22               | 23               | 23                | 24               | 3   | 0.316   |
| Valine                | 108                              | 103              | 94               | 98                | 101              | 103              | 102               | 130              | 21  | 0.262   |
| Phenylalanine         | 73                               | 67               | 67               | 68                | 67               | 68               | 68                | 57               | 23  | 0.891   |
| Isoleucine            | 32                               | 30               | 29               | 29                | 30               | 32               | 28                | 33               | 5   | 0.583   |
| Leucine               | 70 <sup>a</sup>                  | 63 <sup>ab</sup> | 61 <sup>b</sup>  | 61 <sup>b</sup>   | 62 <sup>b</sup>  | 61 <sup>b</sup>  | 63 <sup>ab</sup>  | 71 <sup>a</sup>  | 8   | 0.040   |
| Lysine                | 30                               | 24               | 24               | 25                | 26               | 29               | 28                | 30               | 5   | 0.326   |
| Cysteine <sup>2</sup> | 176                              | 171              | 173              | 174               | 175              | 174              | 171               | 176              | 9   | 0.748   |
| Proline               | 97 <sup>d</sup>                  | 99 <sup>dc</sup> | 106 <sup>c</sup> | 110 <sup>bc</sup> | 122 <sup>a</sup> | 115 <sup>b</sup> | 105 <sup>cc</sup> | 99 <sup>dc</sup> | 5   | 0.001   |
| Total amino acids     | 2108                             | 2134             | 1990             | 2028              | 2048             | 2030             | 2121              | 2135             | 170 | 0.434   |

<sup>1</sup> Values are means with pooled SEM, n=6. Means in a row with superscripts without a common letter differ,  $P < 0.05$ .<sup>2</sup> Cysteine + ½ cystine.

**SUPPLEMENTAL TABLE 4**Concentrations of amino acids in fetal plasma after a single iv bolus injection of L-citrulline to late pregnant ewes<sup>1</sup>

| Amino acid            | Time after bolus injection (min) |                   |                  |                   |                   |                   |                  |                  | SEM | P value |
|-----------------------|----------------------------------|-------------------|------------------|-------------------|-------------------|-------------------|------------------|------------------|-----|---------|
|                       | 0                                | 5                 | 15               | 30                | 60                | 120               | 180              | 240              |     |         |
|                       | μmol/L                           |                   |                  |                   |                   |                   |                  |                  |     |         |
| Aspartate             | 3.8                              | 4.6               | 4.4              | 3.7               | 3.4               | 3.6               | 3.9              | 3.8              | 0.4 | 0.325   |
| Glutamate             | 25                               | 24                | 23               | 25                | 23                | 23                | 24               | 26               | 2   | 0.756   |
| Asparagine            | 22                               | 21                | 20               | 22                | 21                | 21                | 23               | 23               | 3   | 0.801   |
| Serine                | 260                              | 254               | 243              | 266               | 261               | 249               | 270              | 273              | 42  | 0.320   |
| Glutamine             | 182                              | 170               | 169              | 175               | 163               | 157               | 168              | 173              | 16  | 0.283   |
| Histidine             | 26                               | 26                | 24               | 25                | 25                | 24                | 26               | 29               | 2   | 0.367   |
| Glycine               | 231                              | 242               | 228              | 239               | 233               | 220               | 233              | 250              | 28  | 0.475   |
| Threonine             | 116                              | 106               | 100              | 117               | 109               | 106               | 118              | 116              | 9   | 0.302   |
| β-Alanine             | 92                               | 85                | 87               | 96                | 84                | 84                | 91               | 96               | 15  | 0.356   |
| Taurine               | 113                              | 108               | 110              | 112               | 112               | 111               | 118              | 119              | 28  | 0.615   |
| Alanine               | 135                              | 129               | 125              | 145               | 138               | 134               | 149              | 159              | 21  | 0.216   |
| Tyrosine              | 56                               | 52                | 50               | 57                | 56                | 54                | 59               | 63               | 12  | 0.291   |
| Tryptophan            | 132                              | 129               | 123              | 146               | 147               | 131               | 145              | 122              | 64  | 0.938   |
| Methionine            | 17                               | 16                | 16               | 16                | 17                | 16                | 18               | 18               | 1   | 0.309   |
| Valine                | 121                              | 109               | 107              | 115               | 110               | 107               | 118              | 112              | 8   | 0.653   |
| Phenylalanine         | 46                               | 44                | 43               | 46                | 47                | 44                | 49               | 50               | 4   | 0.295   |
| Isoleucine            | 33                               | 29                | 29               | 29                | 31                | 31                | 34               | 30               | 3   | 0.699   |
| Leucine               | 61                               | 56                | 58               | 61                | 59                | 57                | 63               | 62               | 4   | 0.601   |
| Lysine                | 31 <sup>bcd</sup>                | 29 <sup>cd</sup>  | 28 <sup>d</sup>  | 33 <sup>abc</sup> | 31 <sup>bcd</sup> | 33 <sup>abc</sup> | 35 <sup>ab</sup> | 37 <sup>a</sup>  | 5   | 0.021   |
| Cysteine <sup>2</sup> | 179                              | 176               | 174              | 169               | 175               | 175               | 173              | 170              | 10  | 0.280   |
| Proline               | 103 <sup>d</sup>                 | 108 <sup>cd</sup> | 110 <sup>c</sup> | 119 <sup>b</sup>  | 128 <sup>a</sup>  | 123 <sup>ab</sup> | 121 <sup>b</sup> | 120 <sup>b</sup> | 10  | 0.001   |
| Total amino acids     | 1984                             | 1981              | 1970             | 2027              | 1973              | 1983              | 2039             | 2050             | 167 | 0.510   |

<sup>1</sup> Values are means with pooled SEM, n=6. Means in a row with superscripts without a common letter differ, *P* < 0.05.<sup>2</sup> Cysteine + ½ cystine.
